# Supplementary material
Source: PubMed Central journal article supplement (PMC3425187)
Supplement: supp_pp.112.200584_200584Supplemental_Figure_1.pdf [file supp_pp.112.200584_200584Supplemental_Figure_1.pdf]

**A**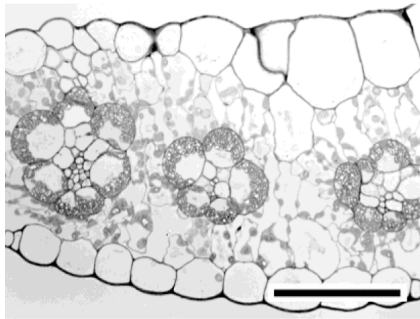**B**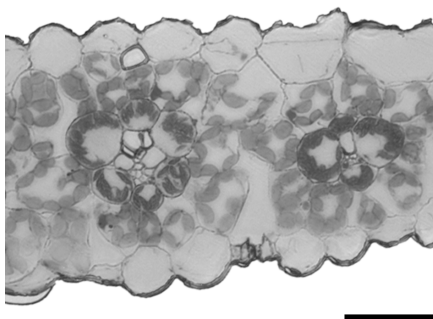**C**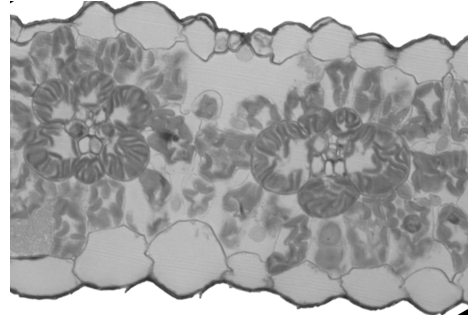**B73****Mo17****Seneca60**Intervein distance ( $\mu\text{m}$ ) $134 \pm 12$  $128 \pm 5$  $126 \pm 5$ 

Intervening M cells

 $2.1 \pm 0.1$  $1.9 \pm 0.1$  $1.9 \pm 0.1$ PBS Cell Area ( $\mu\text{m}^2$ ) $702 \pm 55$  $589 \pm 28$  $787 \pm 134$
