# Supplementary material
Source: PubMed Central journal article supplement (PMC3425187)

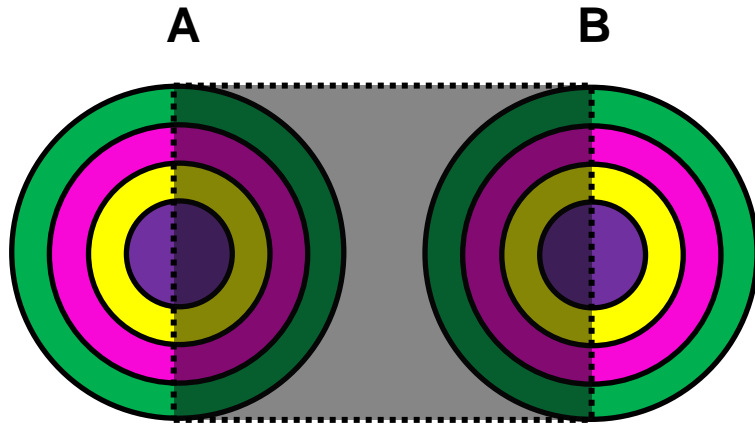

- VASCULAR BUNDLE (VB)
- MESTOME SHEATH (MS)
- PARENCHYMATOUS BUNDLE SHEATH (PBS)
- MESOPHYLL (M)

OAT STARTER

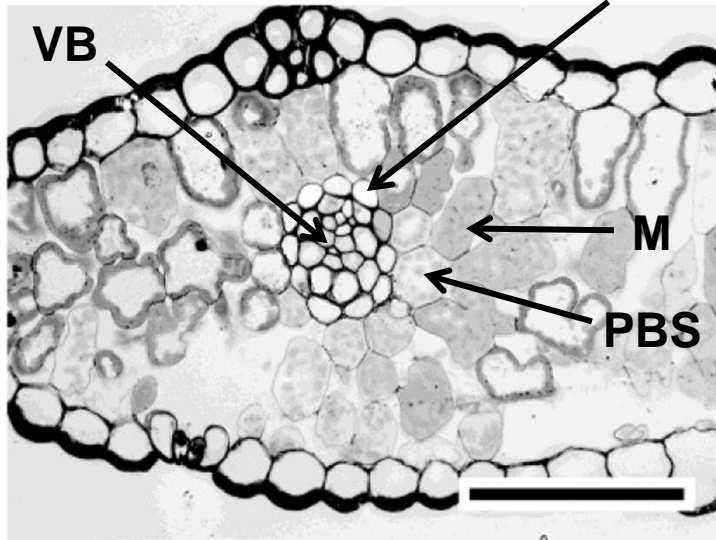

OAT STARTER

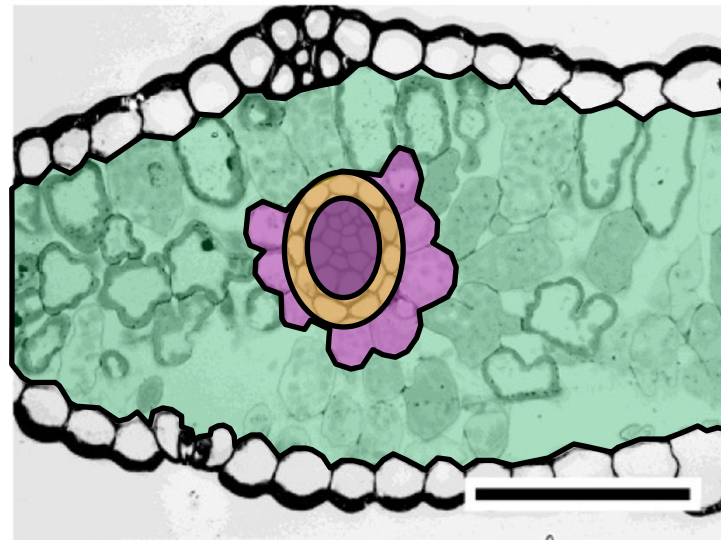

Supplement: supp_pp.112.200584_200584Supplemental_Figure_7.pdf [file supp_pp.112.200584_200584Supplemental_Figure_7.pdf]
