# Supplementary material
Source: PubMed Central journal article supplement (PMC3425187)
Supplement: supp_pp.112.200584_200584Supplemental_Tables.pdf [file supp_pp.112.200584_200584Supplemental_Tables.pdf]

| <b>Chromosome Introduction/Parental Cross</b> | <b>Plant Line</b> | <b>Population</b>  |
|-----------------------------------------------|-------------------|--------------------|
| <b><i>Chromosome 1</i></b>                    |                   |                    |
| Sun II-I x B73                                | 1.36              | F5-K2767 (8/29/08) |
| <b><i>Chromosome 2</i></b>                    |                   |                    |
| Starter I-I x Seneca 60                       | 2.01              | F4-K2641 (4/25/07) |
| Sun II-I x Seneca 60                          | 2.16              | F4-K2341 (4/15/05) |
| Starter I-I x Mo17                            | 2.48              | F4-K2770 (8/29/08) |
| Starter I-I x B73                             | 2.51              | F6-K2775 (8/25/08) |
| <b><i>Chromosome 3</i></b>                    |                   |                    |
| Sun II-I x Seneca 60                          | 3.01              | F6-K2791 (8/25/08) |
| <b><i>Chromosome 4</i></b>                    |                   |                    |
| Starter I-I x Seneca 60                       | 4.01              | F9-K1053 (1/20/04) |
| Sun II-I x B73                                | 4.40              | F4-K2799 (8/13/08) |
| Starter I-I x B73                             | 4.41              | F4-K2804 (8/18/08) |
| <b><i>Chromosome 5</i></b>                    |                   |                    |
| Sun II-I x Seneca 60                          | 5.59              | F5-K2423 (11/1/05) |
| Sun II-I x B73                                | 5.60              | F6-K2805 (9/2/08)  |
| Sun II-I x Mo17                               | 5.61              | F5-K2810 (8/29/08) |
| <b><i>Chromosome 6</i></b>                    |                   |                    |
| Starter I-I x Seneca 60                       | 6.01              | F8-K1035 (6/6/06)  |
| Sun II-I x Seneca 60                          | 6.29              | F2-3775 (10/12/02) |
| Starter I-I x Mo17                            | 6.32              | F4-K2598 (4/1/07)  |
| <b><i>Chromosome 7</i></b>                    |                   |                    |
| Starter I-I x Seneca 60                       | 7.06              | F4-K2122 (7/19/04) |
| <b><i>Chromosome 8</i></b>                    |                   |                    |
| Sun II-I x B73                                | 8.05              | F4-K2893 (11/1/08) |
| <b><i>Chromosome 9</i></b>                    |                   |                    |
| Starter I-I x Seneca 60                       | 9.01              | F7-K2503 (4/15/06) |
| Starter I-I x B73                             | 9.41              | F5-K2891 (9/2/08)  |
| <b><i>Chromosome 10</i></b>                   |                   |                    |
| Starter I-I x Mo17                            | 10.23             | F6-K2903 (8/25/08) |
| <b><i>Oat</i></b>                             |                   |                    |
| Starter I-I                                   |                   |                    |
| Sun II-I                                      |                   |                    |
| <b><i>Maize</i></b>                           |                   |                    |
| B73                                           |                   |                    |

| ID            | Name             | Arabidopsis Homolog | RPKM base | RPKM -1cm | RPKM +4 cm | RPKM tip | Maize Chr |
|---------------|------------------|---------------------|-----------|-----------|------------|----------|-----------|
| GRMZM2G034360 | <i>ZmFHT</i>     | AT5G41040.2         | 1.25      | 146.26    | 0.21       | 0.16     | 8         |
| GRMZM2G162758 | <i>ZmCYP86B1</i> | AT5G23190.1         | 2.43      | 22.27     | 7.12       | 4.77     | 1         |
| GRMZM2G059637 | <i>ZmGPAT5</i>   | AT3G11430.1         | 0.00      | 42.35     | 0.08       | 0.08     | 6         |
| GRMZM2G075140 | <i>ZmKCS2</i>    | AT1G04220.1         | 9.67      | 185.71    | 42.06      | 9.10     | 4         |
| GRMZM2G010868 | <i>ZmLP1</i>     | AT2G38540.1         | 216.90    | 1078.90   | 114.14     | 52.79    | 3         |
| GRMZM2G085678 | <i>ZmSHN1</i>    | AT1G15360.1         | 23.74     | 1.66      | 0.30       | 0.34     | 5         |
| GRMZM2G445602 | <i>ZmFDH</i>     | AT2G26250.1         | 490.71    | 481.01    | 75.01      | 9.44     | 1         |
| GRMZM2G114642 | <i>ZmGL1</i>     | AT5G57800.1         | 1.03      | 447.49    | 69.54      | 29.06    | 7         |
| GRMZM2G164974 | <i>ZmKCS6</i>    | AT1G68530.1         | 11.44     | 478.30    | 86.14      | 16.39    | 1         |
| GRMZM2G157569 | <i>ZmABCG12</i>  | AT1G51500.1         | 73.96     | 341.30    | 54.96      | 20.13    | ?         |

\* Columns 1 to 7 are data taken directly from Li et al. (2010).

\* Column 8 are gene locations determined in this study using the BLAST function in MaizeGDB.

| <b>Primer Name</b> | <b>Gene</b>       | <b>Orientation</b> | <b>Primer Sequence (5'-3')</b> |
|--------------------|-------------------|--------------------|--------------------------------|
| ZmCA F             | <i>ZmCA2</i>      | F                  | CCAAGTACATGGTGTTCGCTTGCT       |
| ZmCA R             | <i>ZmCA2</i>      | R                  | CATTTGCAAGCCCTTCCTTGACGA       |
| ZmDiT1 F           | <i>ZmDiT1</i>     | F                  | CATCATCATCGCCTTTCTCC           |
| ZmDiT1 R           | <i>ZmDiT1</i>     | R                  | GATGAGCCAGATGACCTCGT           |
| ZmDiT2 F           | <i>ZmDiT2</i>     | F                  | TGCGAACTCCAGTGCTCTCTTCTT       |
| ZmDiT2 R           | <i>ZmDiT2</i>     | R                  | TTCGACATCCAGGACACAATCCCA       |
| ZmMDH6 F           | <i>ZmMDH6</i>     | F                  | ATGGCCAAATCTTTGCTGACCAGG       |
| ZmMDH6 R           | <i>ZmMDH6</i>     | R                  | TCACCATCACCTTCGATCTGCAT        |
| ZmNADP-ME1 F       | <i>ZmNADP-ME1</i> | F                  | GTTGACCCATCAGTTTGCTTGCCCT      |
| ZmNADP-ME1 R       | <i>ZmNADP-ME1</i> | R                  | TTGAACGGCCCTGACTCCATGTAT       |
| ZmOMT1 F           | <i>ZmOMT1</i>     | F                  | ATCTTCCTACCGCTCGTCAAGTCT       |
| ZmOMT1 R           | <i>ZmOMT1</i>     | R                  | ATGCCAAGCCCTCCAACAAACTTC       |
| ZmPEPC F           | <i>ZmPEPC</i>     | F                  | CACGCACCTCGGCATCGGGTTCGTACCGCG |
| ZmPEPC R           | <i>ZmPEPC</i>     | R                  | CCTGCGCCATCTCCTCCTGCGCCCTGT    |
| ZmPPDK F           | <i>ZmPPDK</i>     | F                  | TGAAGATCGCCGTGGACATGGTTA       |
| ZmPPDK R           | <i>ZmPPDK</i>     | R                  | TAACATCATCCACCCAGGCCATGA       |

| <b>Primer Name</b>   | <b>Gene</b>    | <b>Primer Sequence (5'-3')</b> | <b>Reference/Source</b> |
|----------------------|----------------|--------------------------------|-------------------------|
| ZmOMT1 FqPCR         | <i>ZmOMT1</i>  | GCAATGGCTGGCTACCTCAACAAA       | Tolley                  |
| ZmOMT1 RqPCR         | <i>ZmOMT1</i>  | AGCACCAAGACACCGAATGAGAGT       | Tolley                  |
| ZmPEPC FqPCR         | <i>ZmPEPC</i>  | AAGCAAATTCCTCCAAACGAGCCC       | Tolley                  |
| ZmPEPC RqPCR         | <i>ZmPEPC</i>  | AGCTCAAGTGGCTCAAGGAACTCT       | Tolley                  |
| AsACTIN FqPCR        | <i>AsACTIN</i> | AGCTCGCATATGTGGCTCTTGACT       | Tolley                  |
| AsACTIN RqPCR        | <i>AsACTIN</i> | TCTCATGGATTCCAGCAGCTTCCA       | Tolley                  |
| AsACTIN Degenerate R | <i>AsACTIN</i> | GGTATTGTGYTSGAYTCTGGTGATGGTGT  | Tolley                  |
| AsACTIN Degenerate F | <i>AsACTIN</i> | CCTTCCTGATATCVACRTCACAYTTCATG  | Tolley                  |
| RTMaz95 F            | <i>ZmACTIN</i> | GAAGCACCTCTGAACCCAAA           | Lin et al. 2008         |
| RTMaz95 R            | <i>ZmACTIN</i> | GGCAGTCAGTCAGATCACGA           | Lin et al. 2008         |
