# Supplementary material
Source: PubMed Central journal article supplement (PMC3425187)

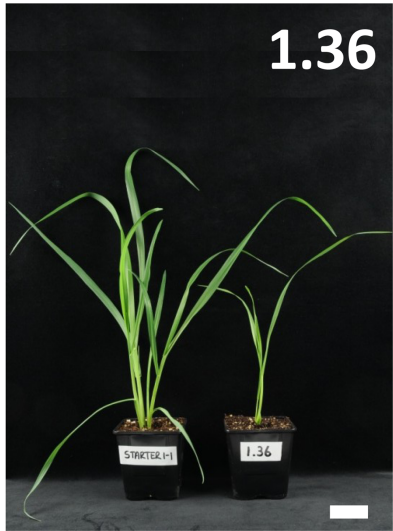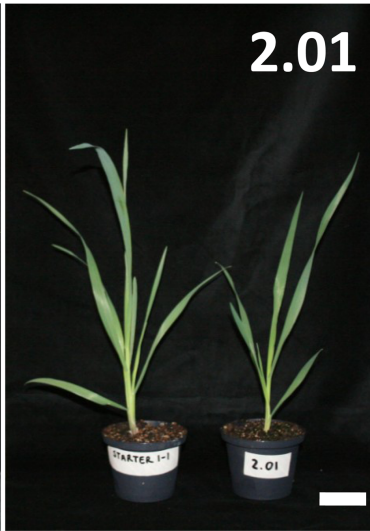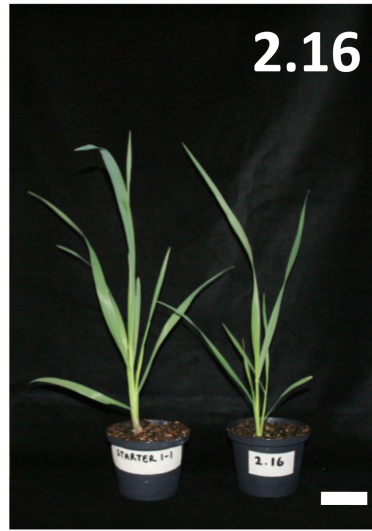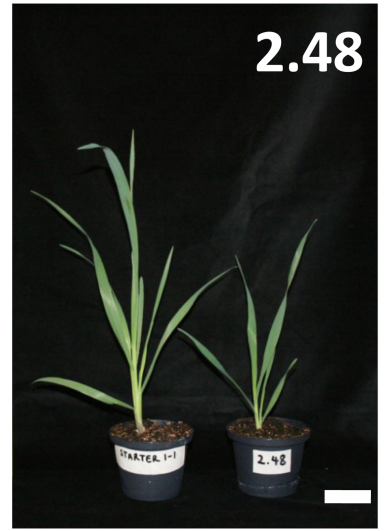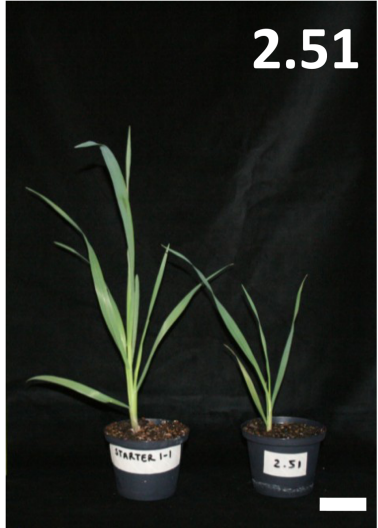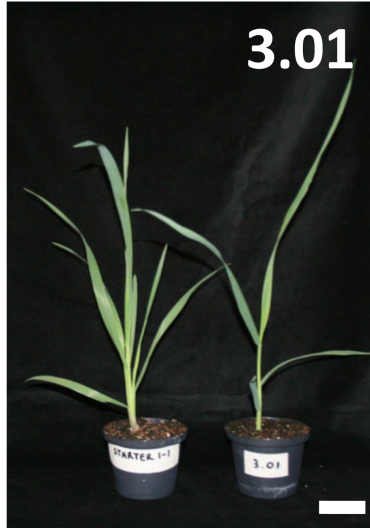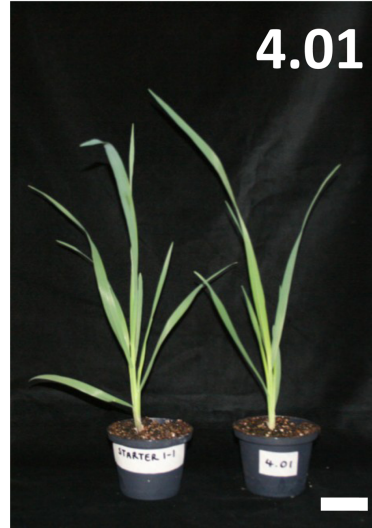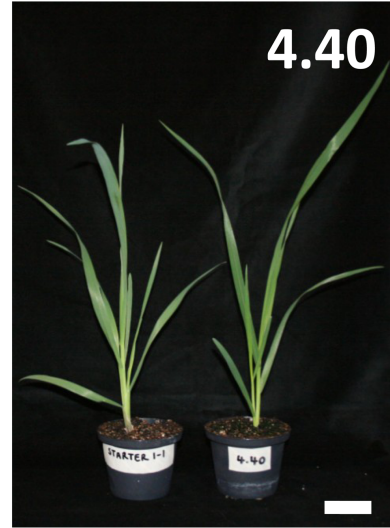

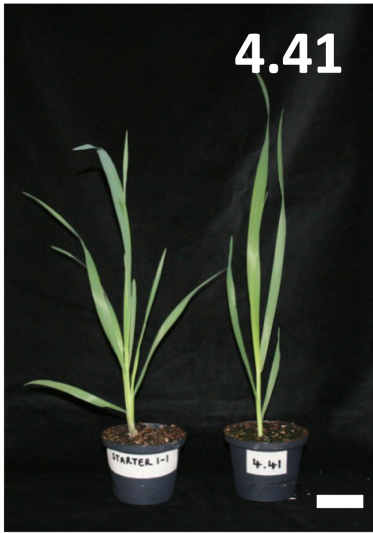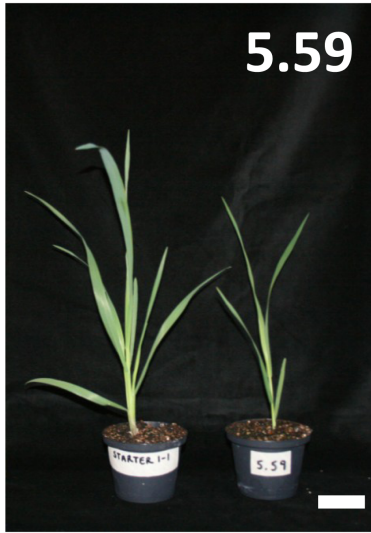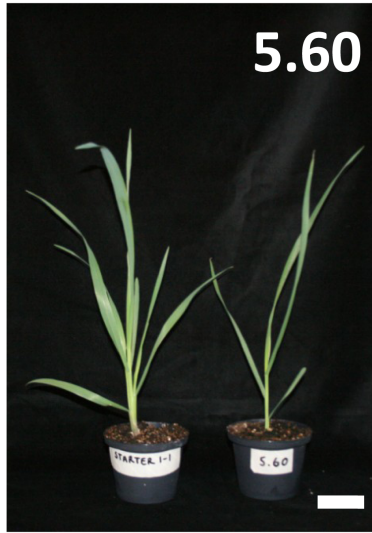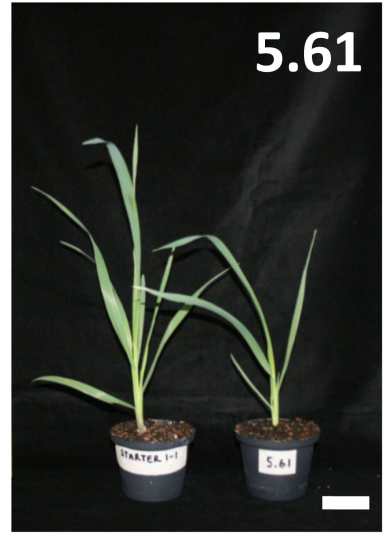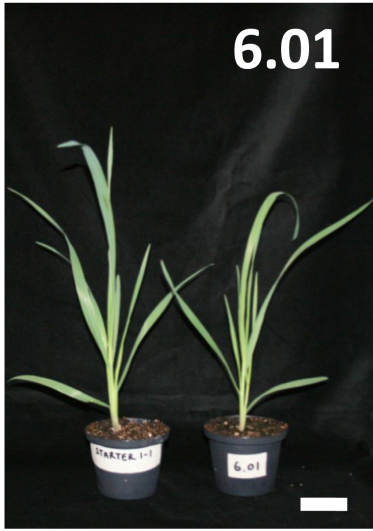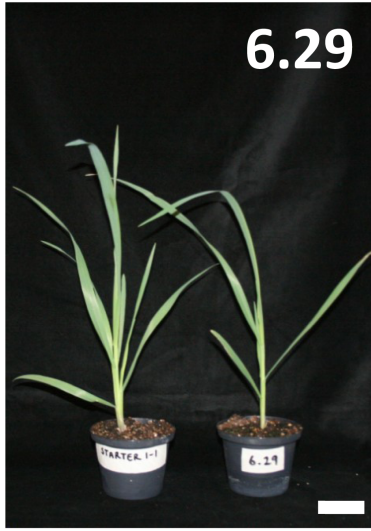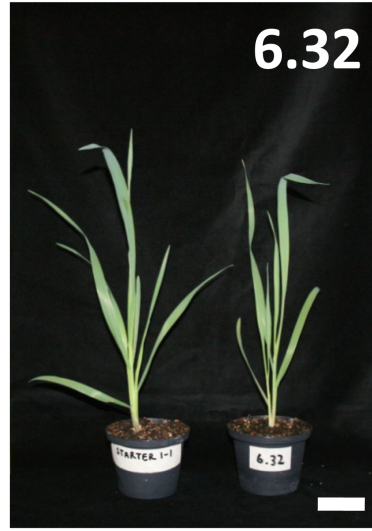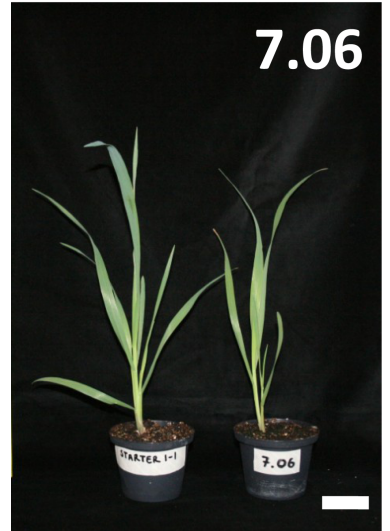



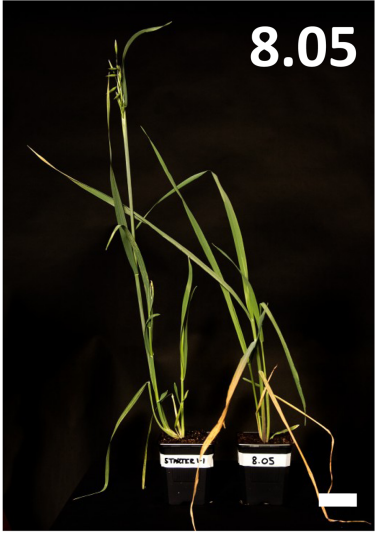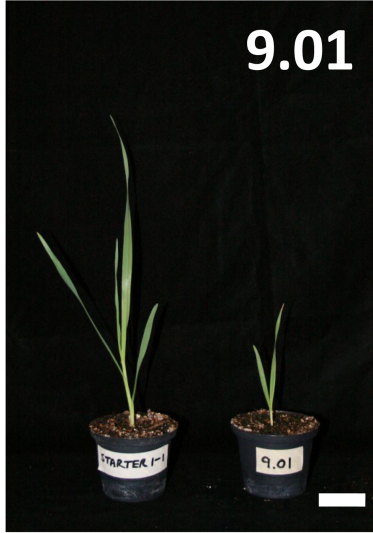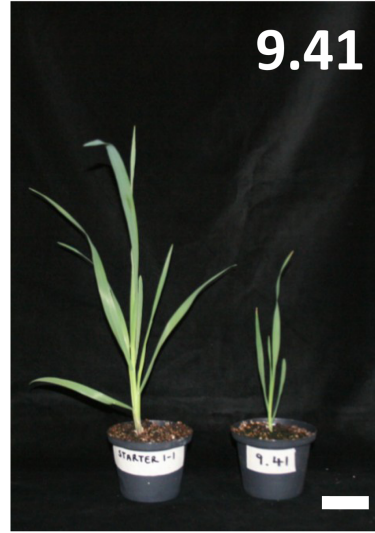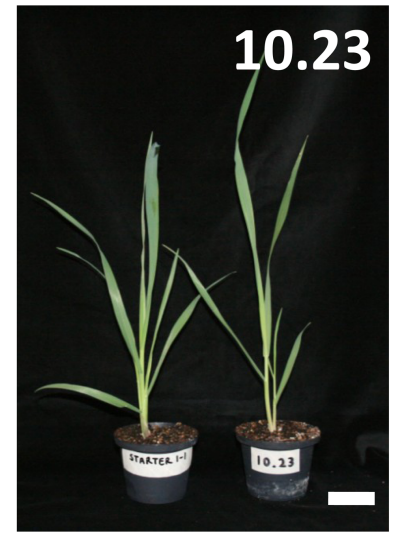

Supplement: supp_pp.112.200584_200584Supplemental_FIgure_6.pdf [file supp_pp.112.200584_200584Supplemental_FIgure_6.pdf]

OAT STARTER

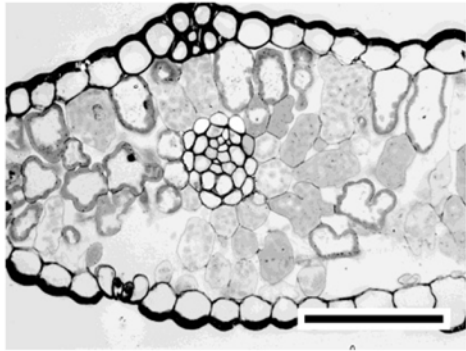

1.36

OAT SUN II

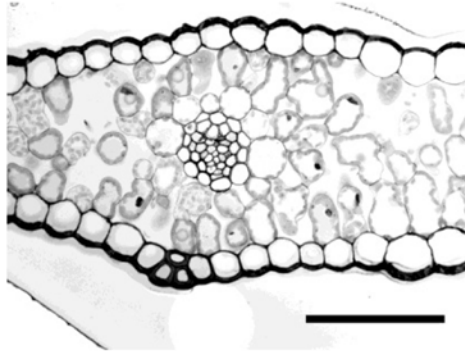

2.01

MAIZE B73

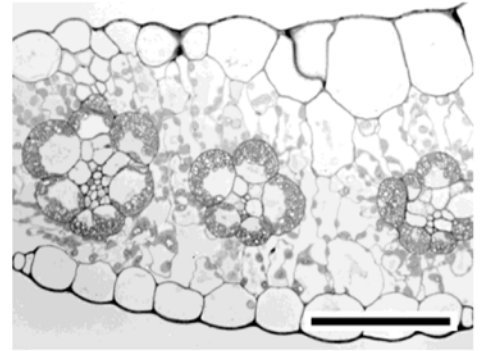

2.48

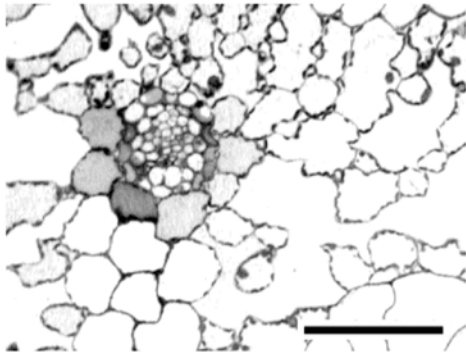

2.51

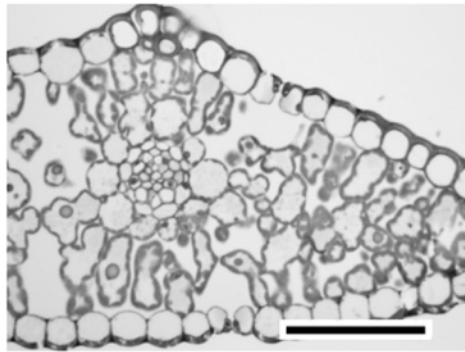

3.01

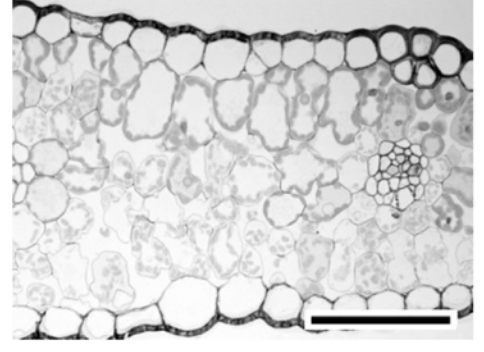

4.01

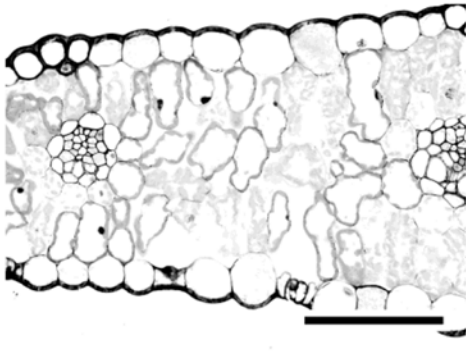

4.40

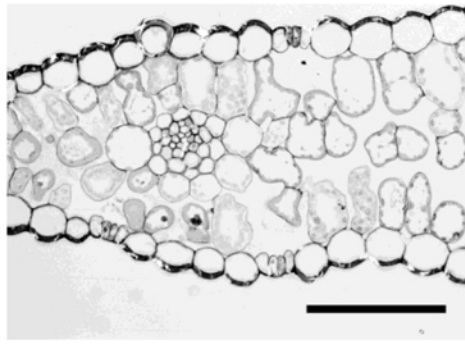

4.41

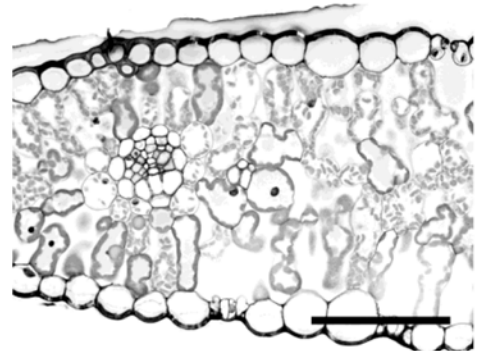

5.59

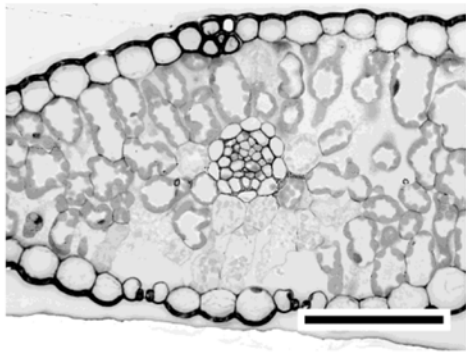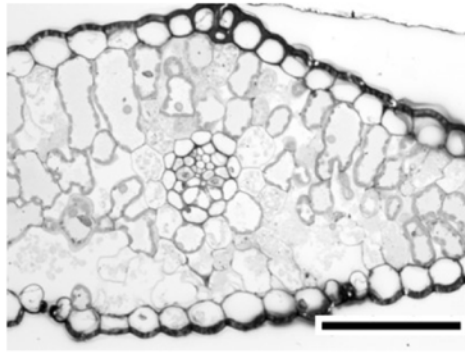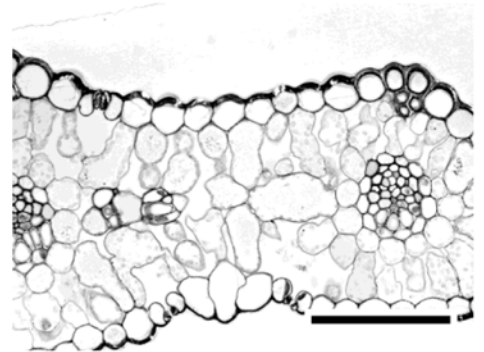

OAT STARTER

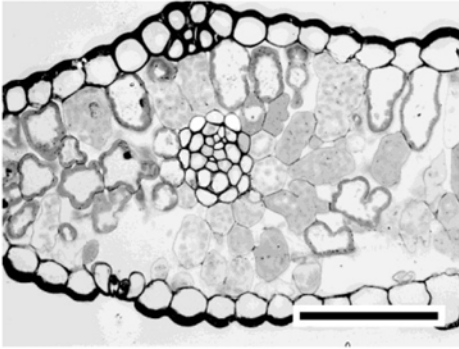

5.61

OAT SUN II

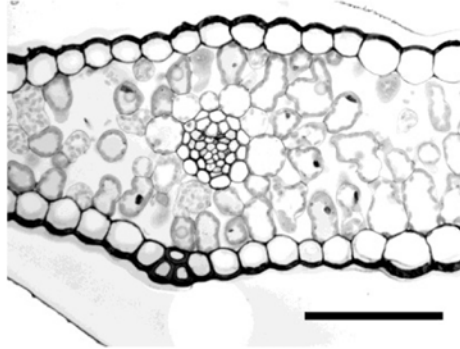

6.01

MAIZE B73

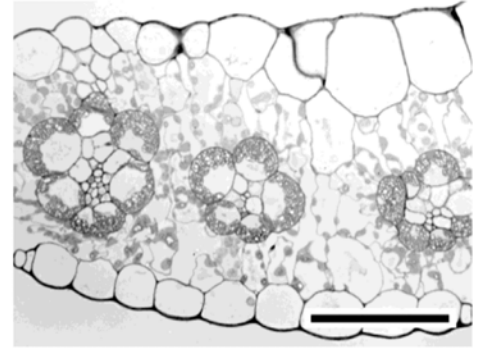

6.29

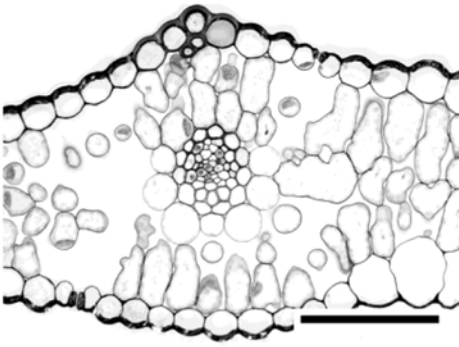

6.32

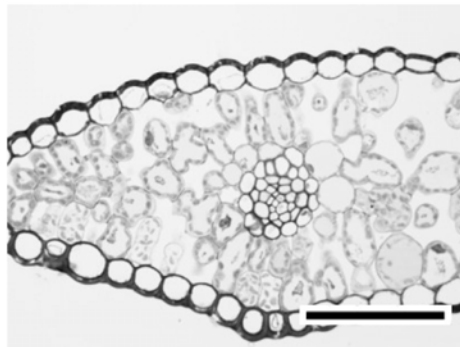

7.06

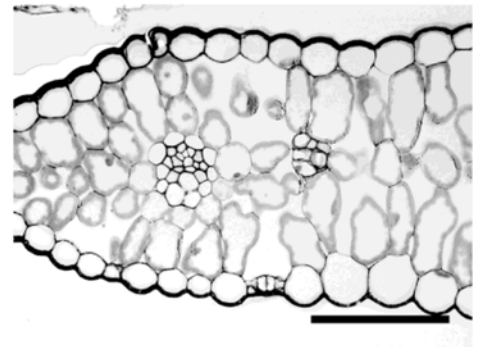

8.05

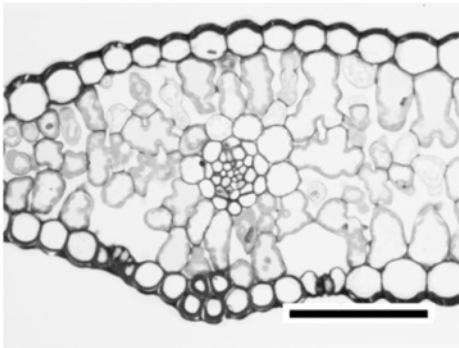

9.01

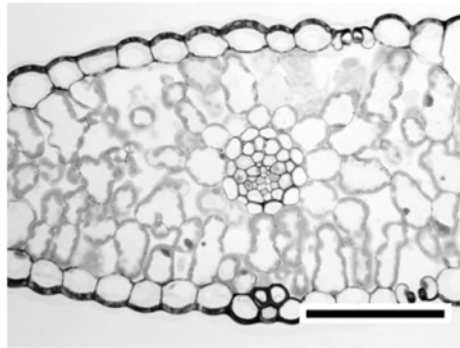

9.41

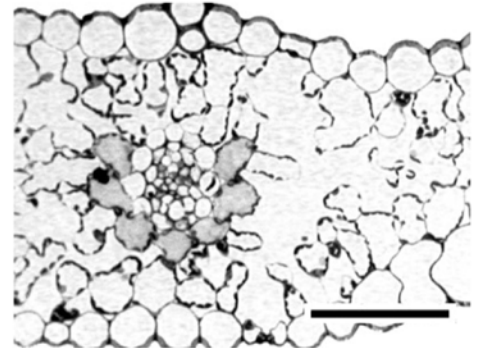

10.23

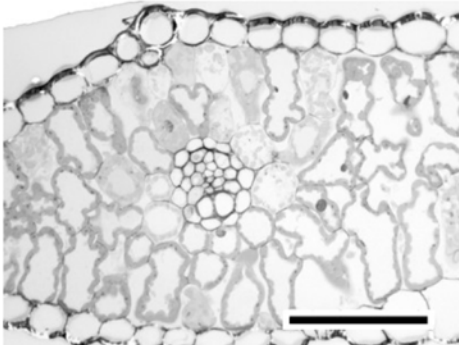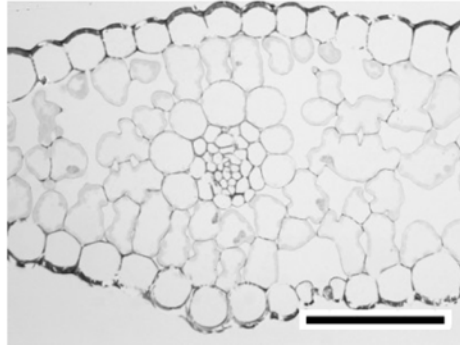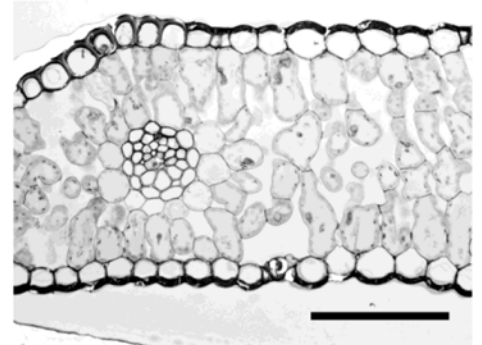

Supplement: supp_pp.112.200584_200584Supplemental_Figure_2.pdf [file supp_pp.112.200584_200584Supplemental_Figure_2.pdf]

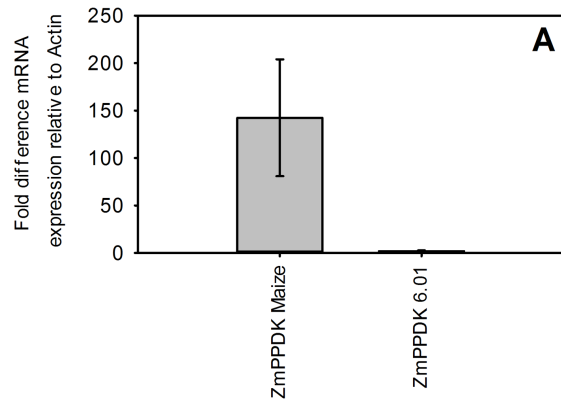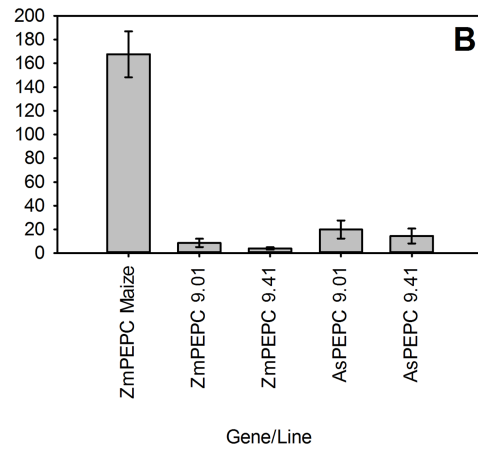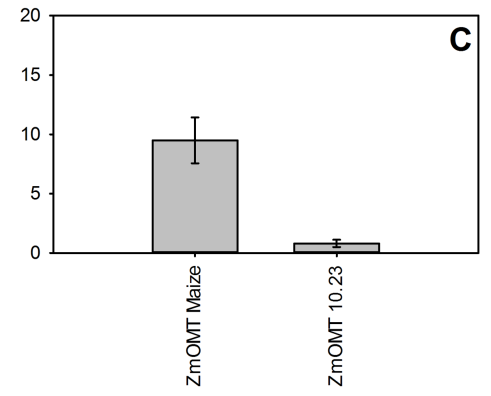

Supplement: supp_pp.112.200584_200584Supplemental_Figure_3.pdf [file supp_pp.112.200584_200584Supplemental_Figure_3.pdf]

# OAT STARTER

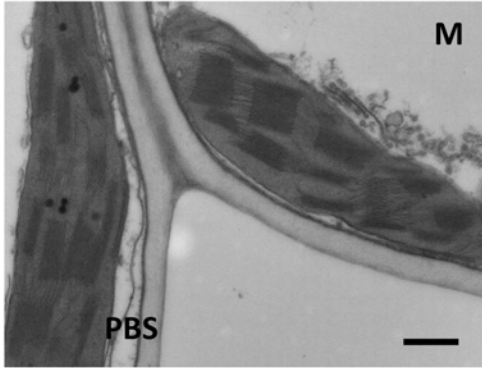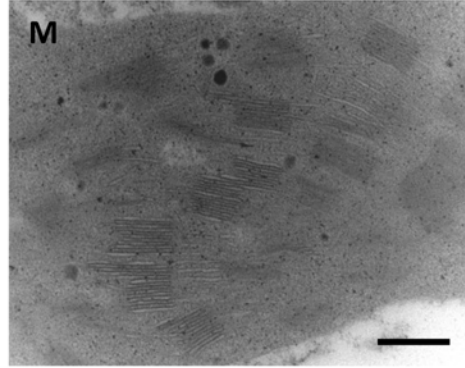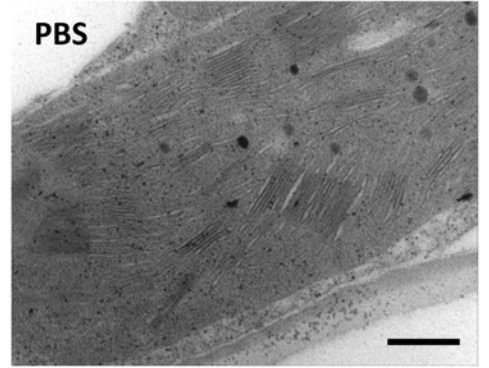

# OAT SUN II

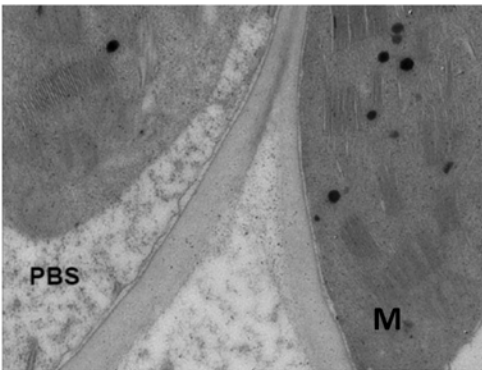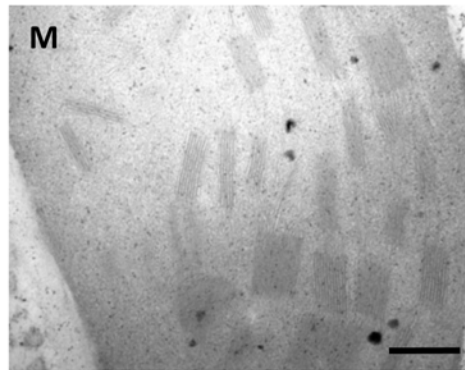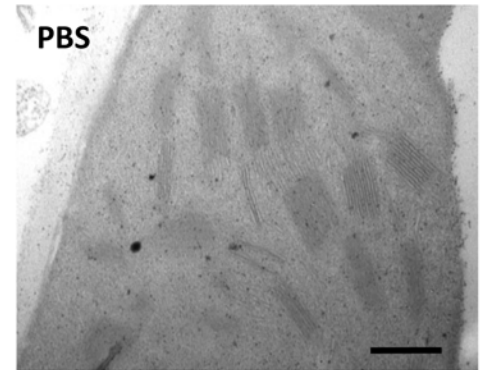

# MAIZE

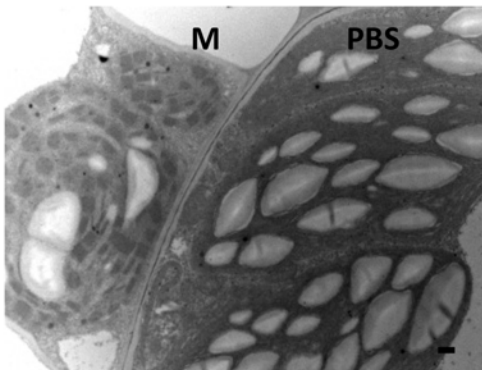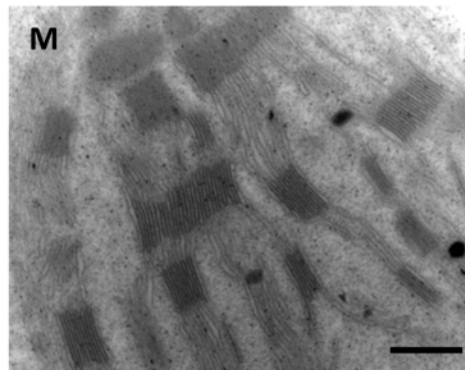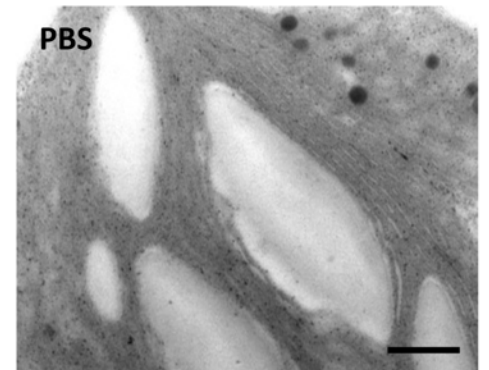

# 3.01

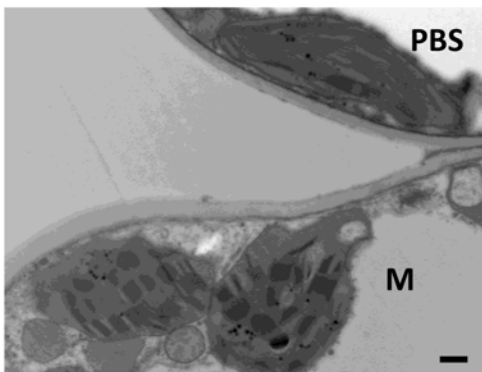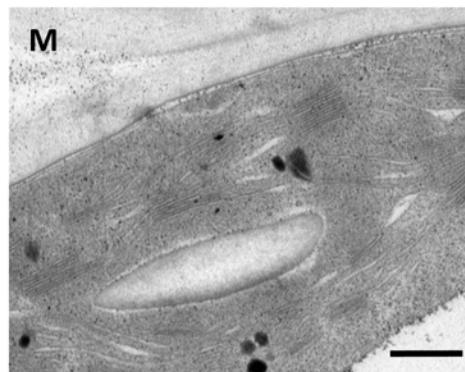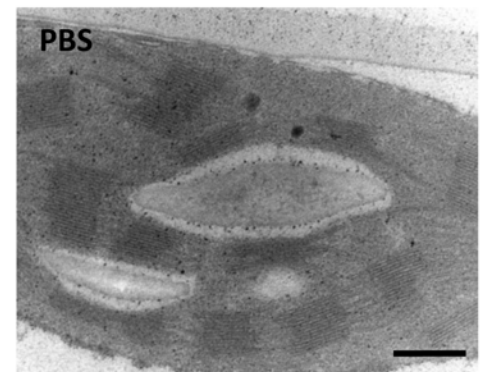

6.01

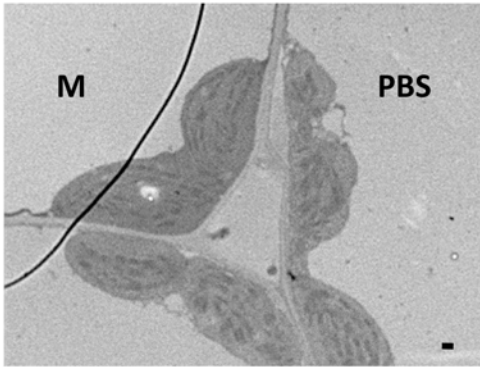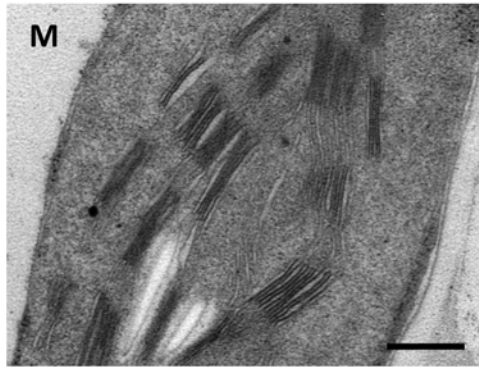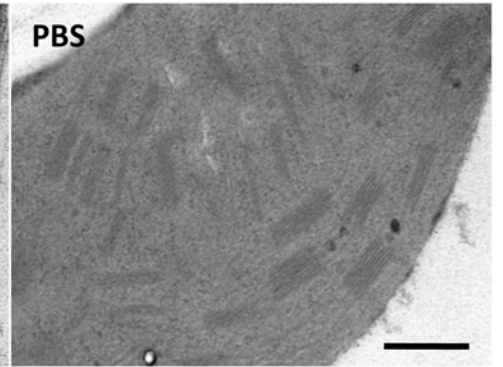

6.32

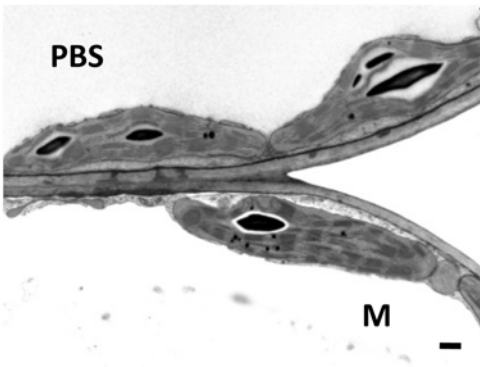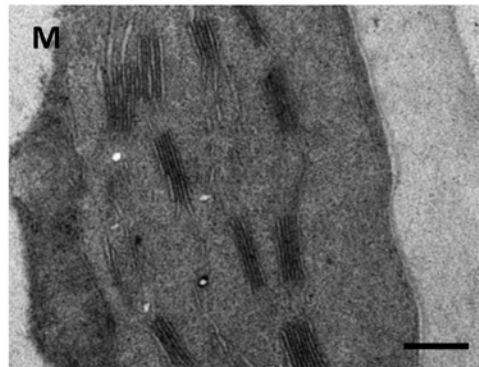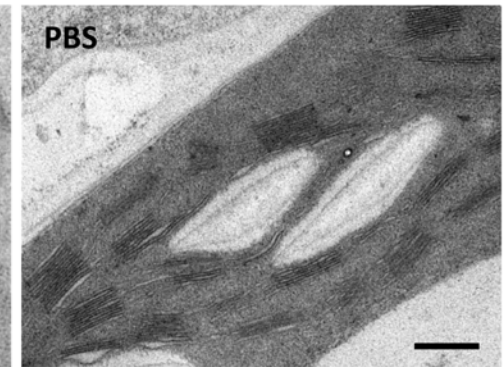

9.01

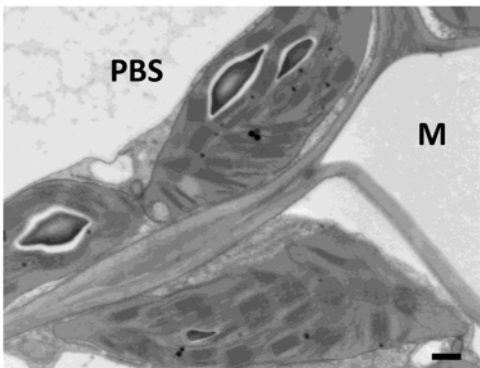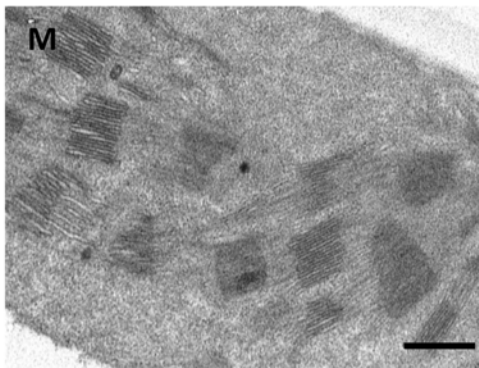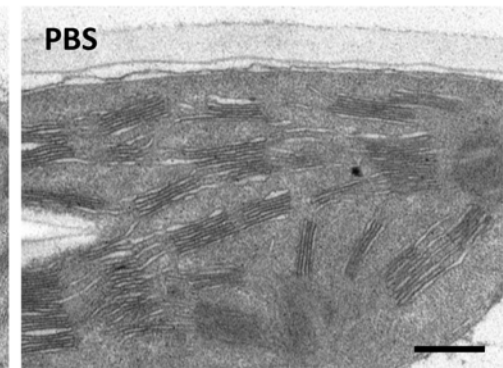

9.41

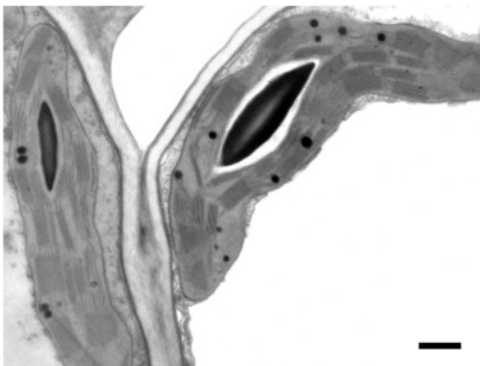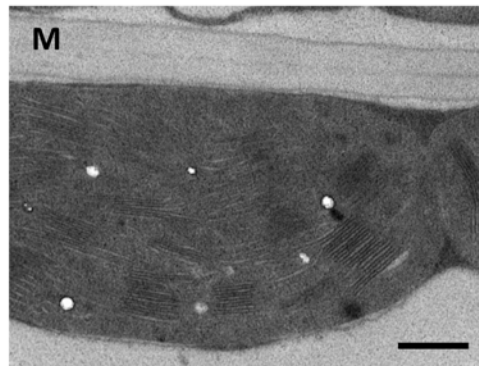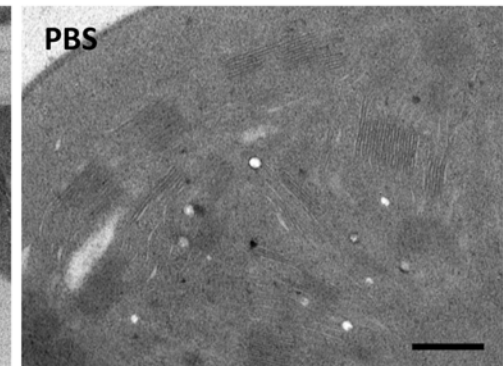

10.23

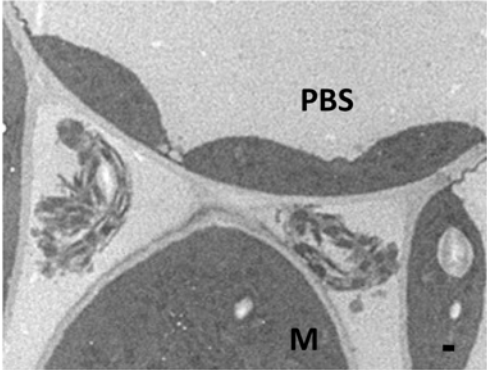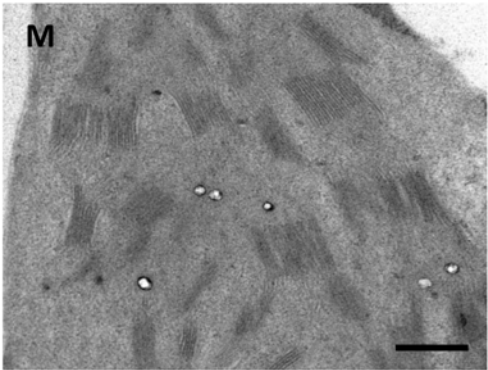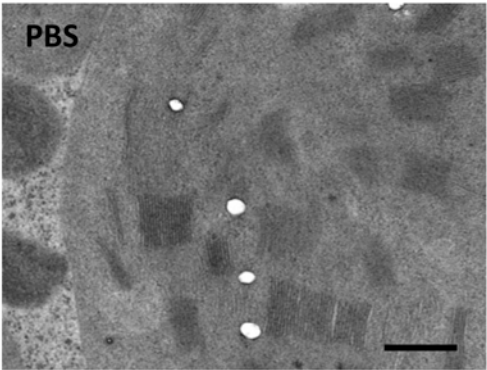

Supplement: supp_pp.112.200584_200584Supplemental_Figure_4.pdf [file supp_pp.112.200584_200584Supplemental_Figure_4.pdf]

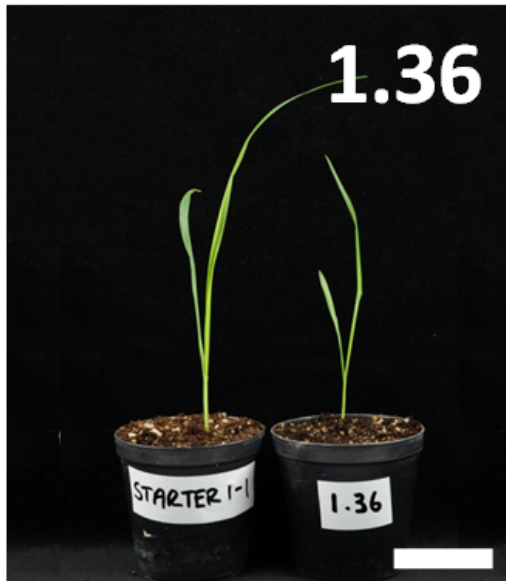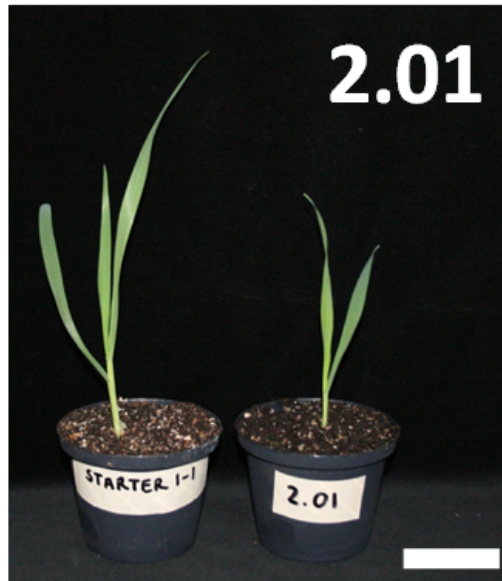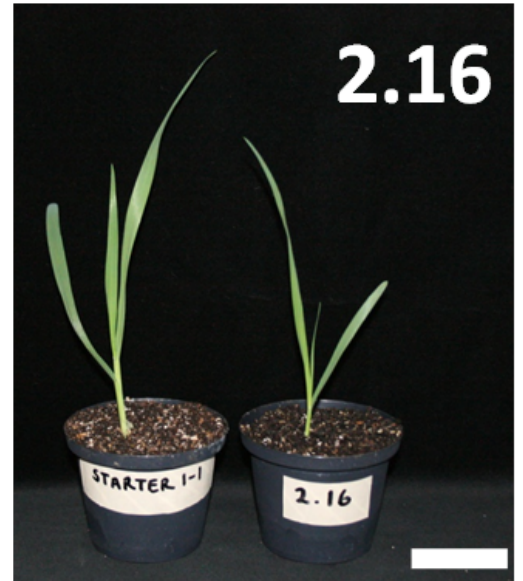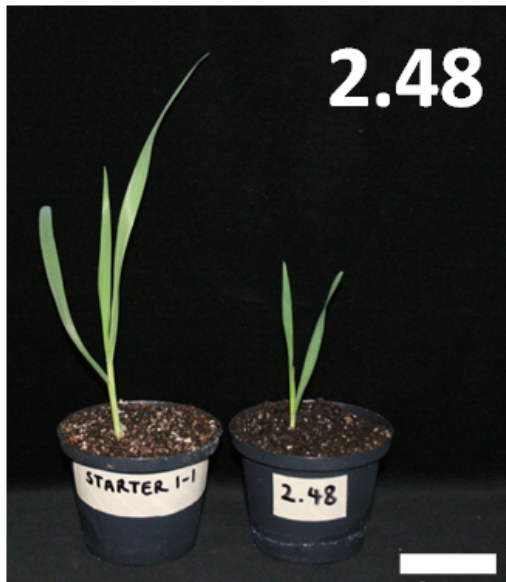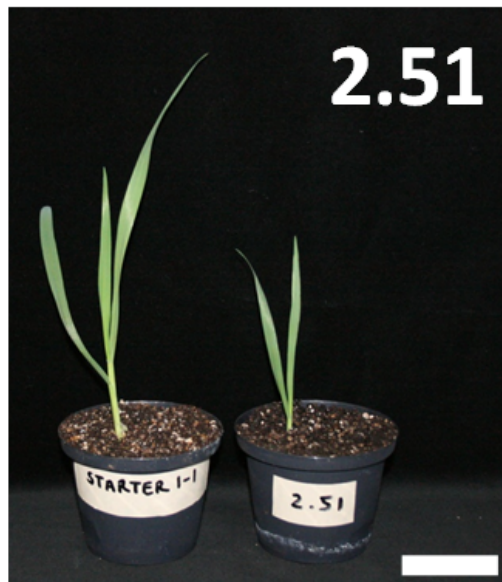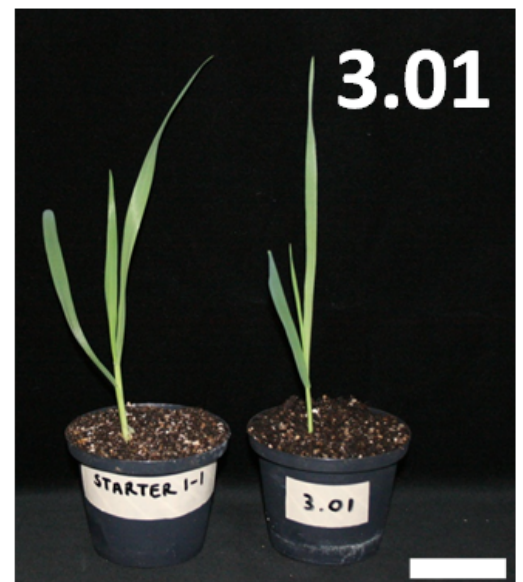

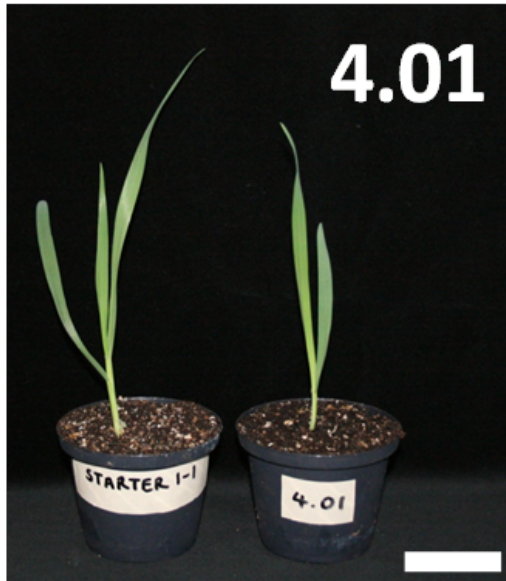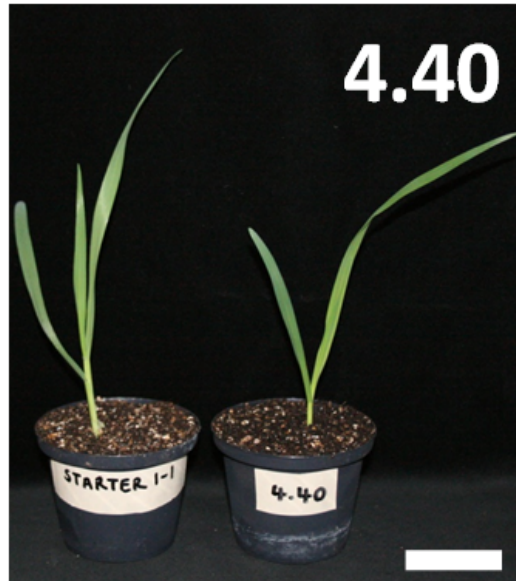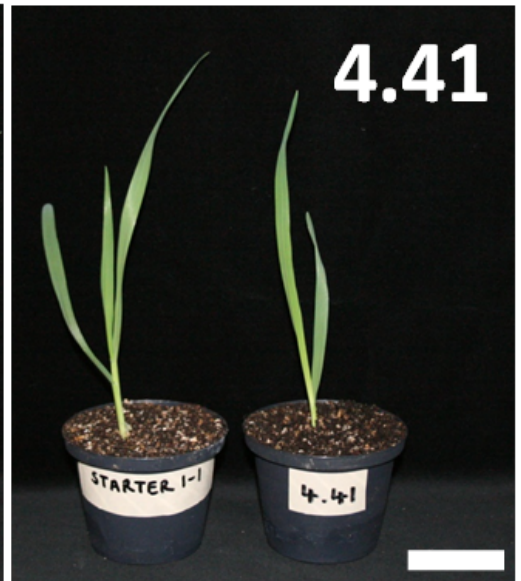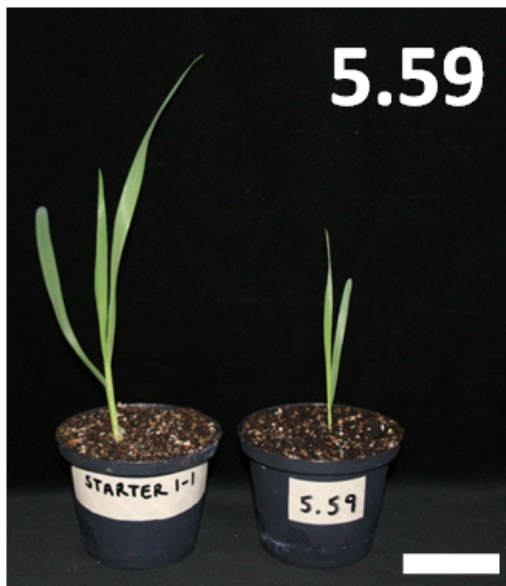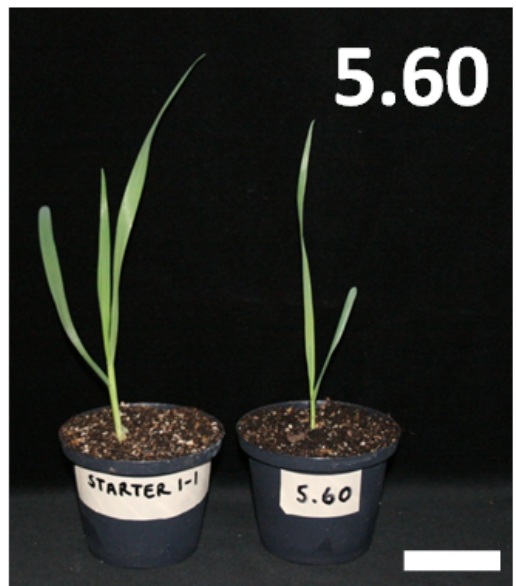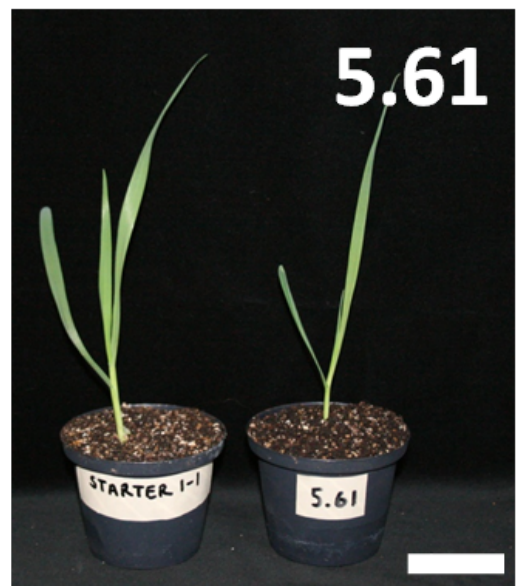

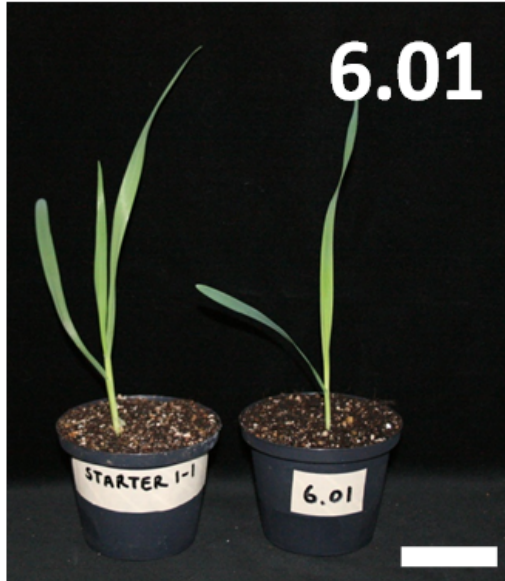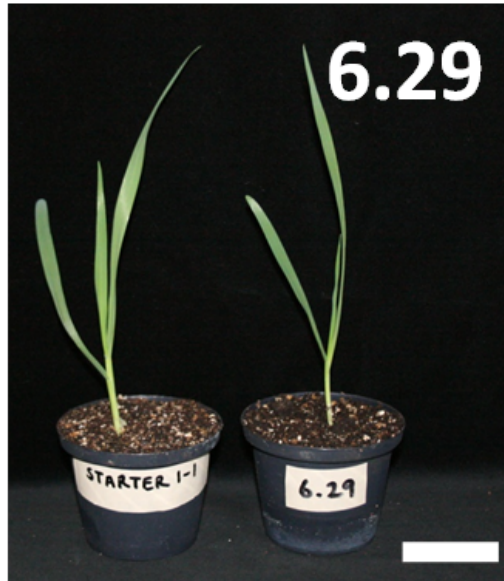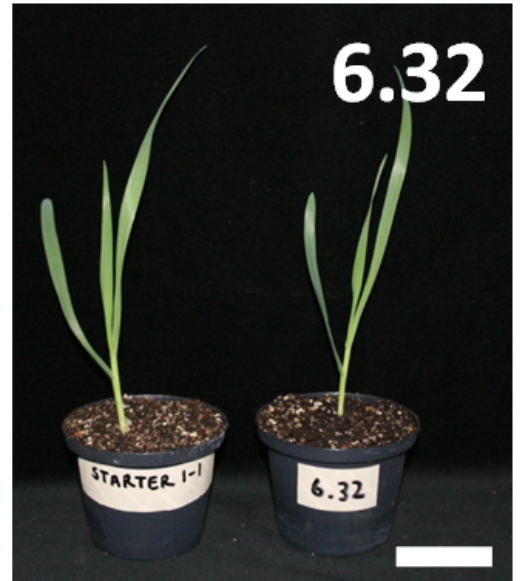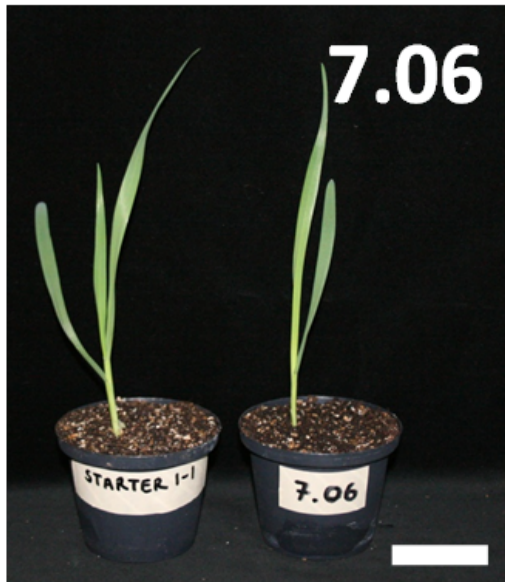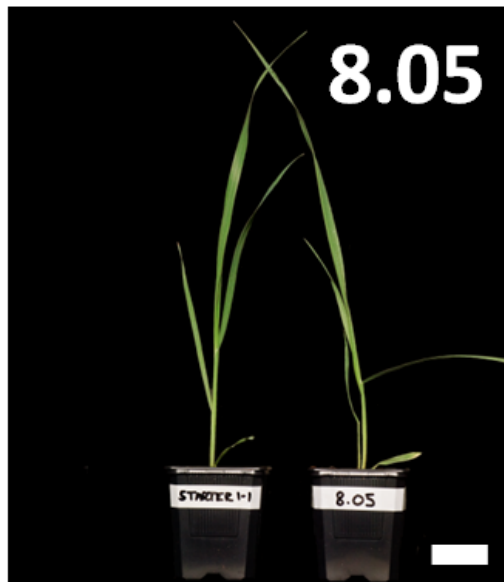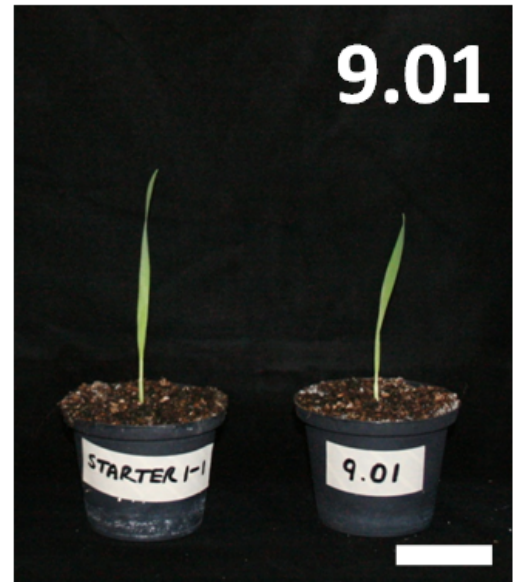

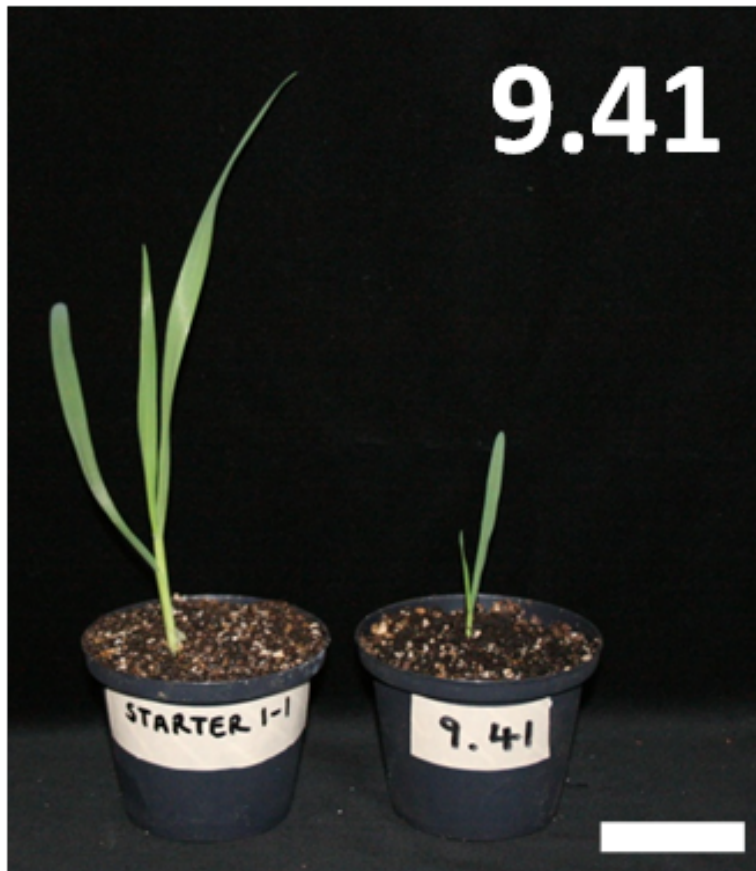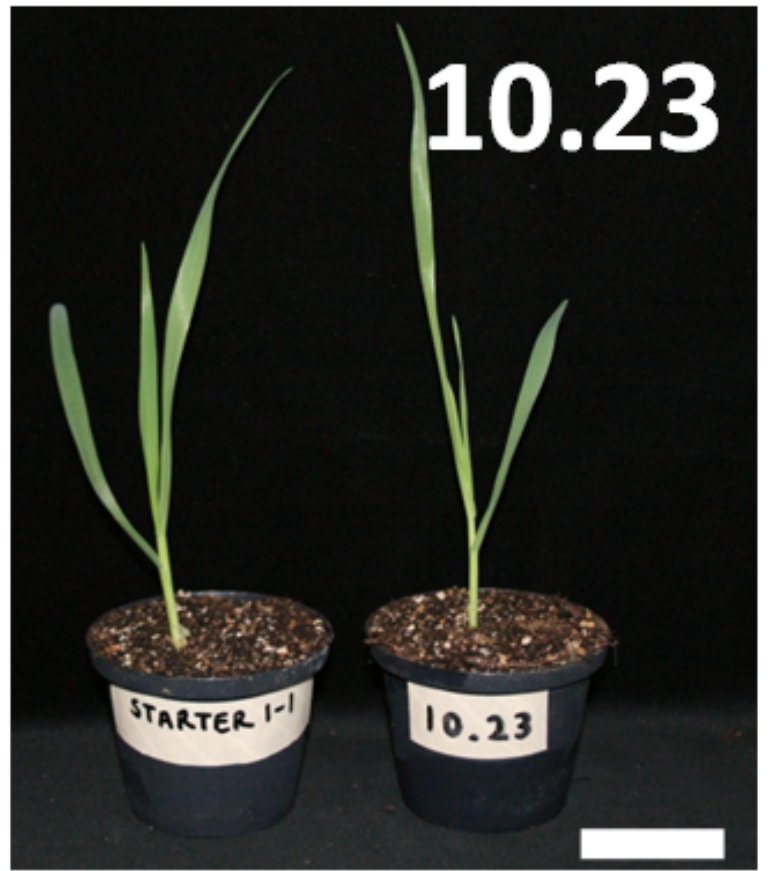

Supplement: supp_pp.112.200584_200584Supplemental_Figure_5.pdf [file supp_pp.112.200584_200584Supplemental_Figure_5.pdf]
